February 2012

# PSYCHIATRIC SERVICES

A Journal of the  
American Psychiatric  
Association

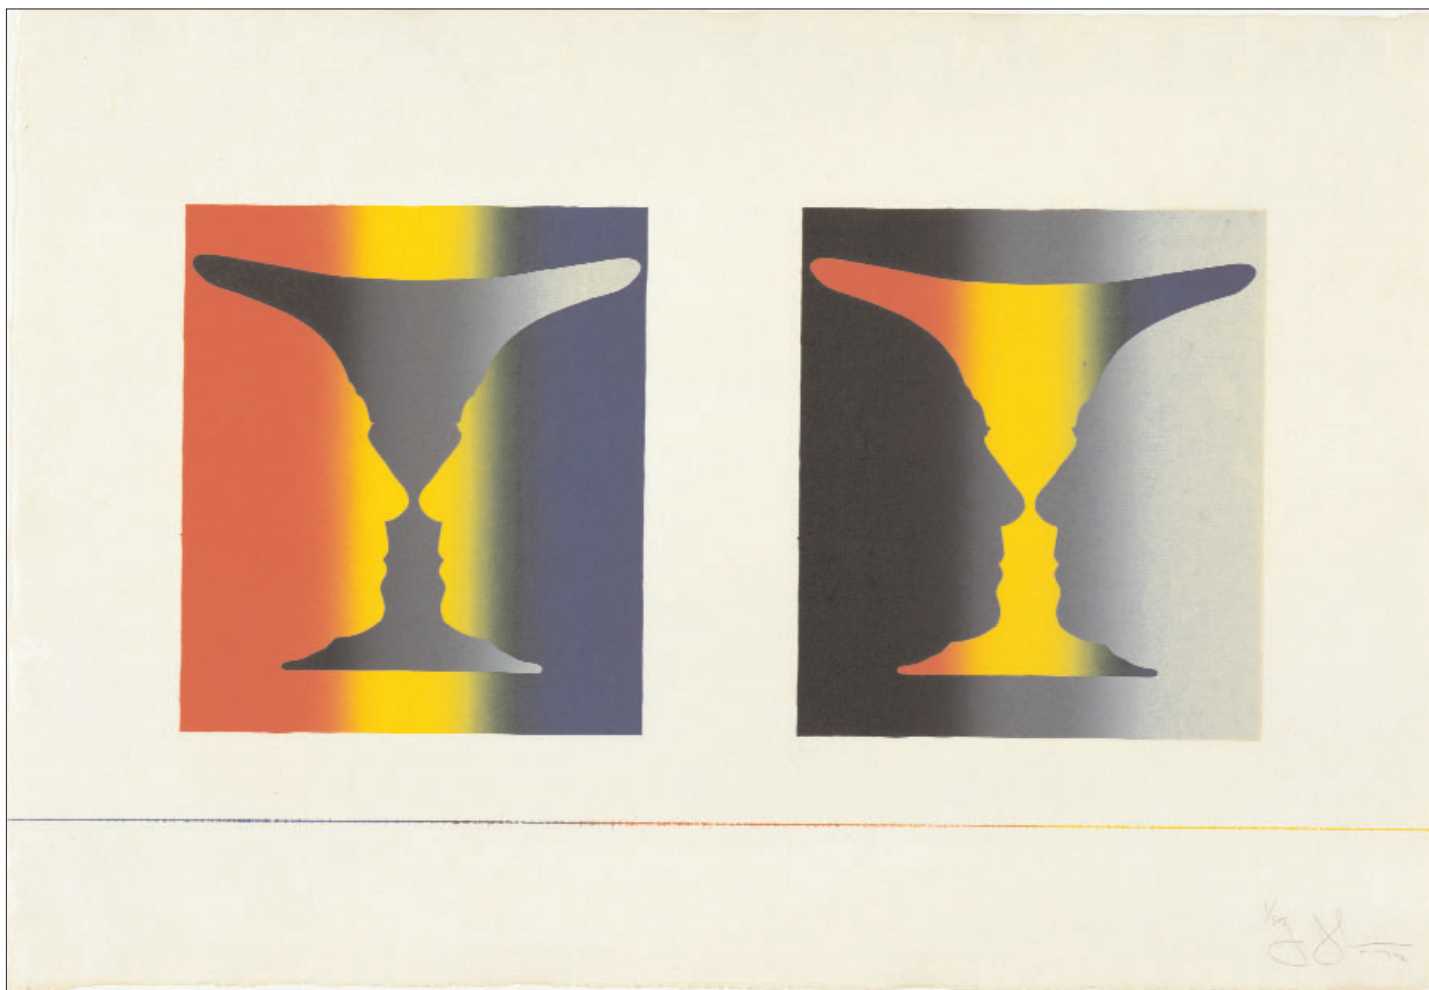

◆ Use and Costs of Medication  
Among Youths With ADHD  
in a State Medicaid Program

◆ Mental Health Courts  
in Juvenile Justice:  
A National Survey

◆ Cutting Inpatient Capacity:  
Can It Be Accomplished  
Without Negative Impacts?
